# Supplementary material for: SBE6: a novel long-range enhancer involved in driving sonic hedgehog expression in neural progenitor cells
Source: PubMed Central journal article supplement (PMC5133441; doi:10.1098/rsob.160197), 2016-11-16
Supplement: rsob160197supp2.pdf [file rsob160197supp2.pdf]

**A**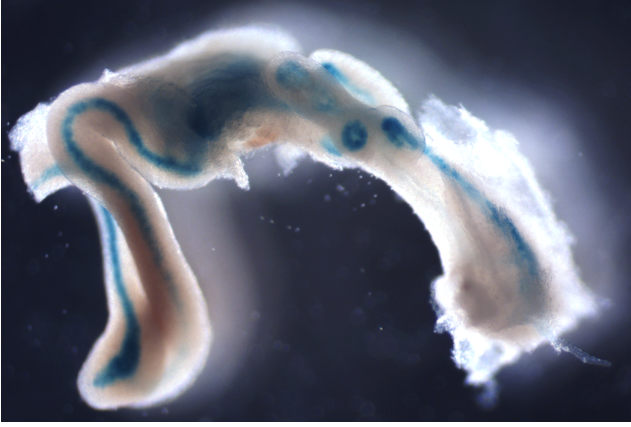**B**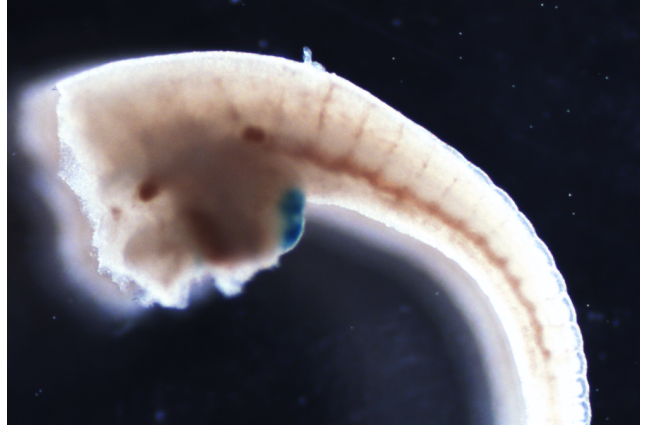**C**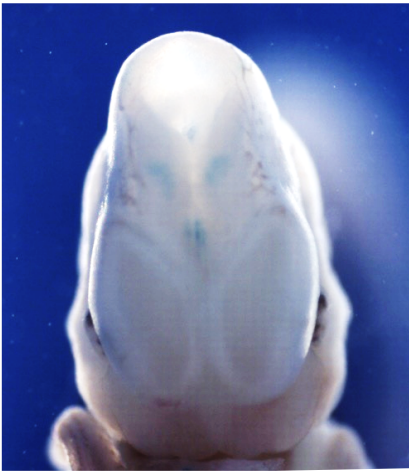**D**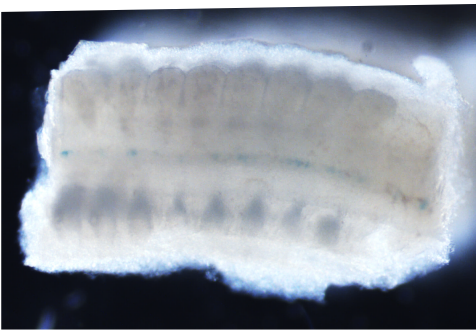

**Supplementary Figure 1. Mouse SBE6.1 Transgenic reporter.**

A) LacZ staining in the gut of a transient SBE6.1-lacZ mouse embryo at E11.5. B) LacZ staining in the cloaca (right) of a transient SBE6.1-lacZ mouse embryo at E11.5. C) LacZ staining in the brain of a transient SBE6.1-lacZ mouse embryo at E11.5. D) LacZ staining in the floor-plate of the spinal cord in a transient SBE6.1 transgenic embryo.
